# Supplementary material for: Cardiovascular risk factors and cognitive decline in older people with type 2 diabetes
Source: PubMed Central journal article supplement (PMC4473016; doi:10.1007/s00125-015-3581-0), 2015-04-07
Supplement: 125_2015_3581_MOESM1_ESM.pdf [file 125_2015_3581_MOESM1_ESM.pdf]

**ESM Table 1: Linear regression models of level of and change in follow-up *g* and cognitive test scores on vascular risk factors**

|                              |                           | Four-year cognitive change                 |                                                        |                                                              | Estimated lifetime cognitive change |                                              |
|------------------------------|---------------------------|--------------------------------------------|--------------------------------------------------------|--------------------------------------------------------------|-------------------------------------|----------------------------------------------|
|                              | Age and sex adjusted beta | Beta adjusted for age, sex, baseline score | Beta adjusted for age, sex, baseline score, covariates | Beta adjusted for age, sex, baseline score, covariates, MHVS | Beta adjusted for age, sex, MHVS    | Beta adjusted for age, sex, MHVS, covariates |
| <u><i>G</i></u>              |                           |                                            |                                                        |                                                              |                                     |                                              |
| Cholesterol                  |                           |                                            |                                                        |                                                              | 0.04 (0.176)                        | 0.04 (0.208)                                 |
| Hypercholesterolaemia        |                           |                                            |                                                        |                                                              | 0.04 (0.181)                        | 0.04 (0.157)                                 |
| Historical systolic BP       |                           |                                            |                                                        |                                                              | -0.01 (0.827)                       | 0.00 (0.873)                                 |
| Historical diastolic BP      |                           |                                            |                                                        |                                                              | 0.01 (0.861)                        | -0.01 (0.853)                                |
| Poor BP control              |                           |                                            |                                                        |                                                              | -0.01 (0.813)                       | 0.00 (0.987)                                 |
| Hypertension                 |                           |                                            |                                                        |                                                              | 0.04 (0.124)                        | 0.06 (0.040)                                 |
| Pack-years                   |                           |                                            |                                                        |                                                              | -0.10 (0.001)                       | -0.10 (0.001)                                |
| Historical HbA <sub>1c</sub> |                           |                                            |                                                        |                                                              | -0.10 (0.001)                       | -0.07 (0.015)                                |
| Poor glycaemic control       |                           |                                            |                                                        |                                                              | -0.03 (0.243)                       | -0.01 (0.748)                                |
| Clinic plasma glucose        |                           |                                            |                                                        |                                                              | 0.03 (0.289)                        | 0.05 (0.104)                                 |
| <u>Logical Memory</u>        |                           |                                            |                                                        |                                                              |                                     |                                              |
| Cholesterol                  | 0.09 (0.014)              | 0.05 (0.059)                               | 0.05 (0.080)                                           | 0.04 (0.161)                                                 | 0.05 (0.121)                        | 0.05 (0.130)                                 |
| Hypercholesterolaemia        | 0.01 (0.873)              | 0.03 (0.247)                               | 0.04 (0.146)                                           | 0.04 (0.170)                                                 | 0.02 (0.631)                        | 0.02 (0.620)                                 |
| Historical systolic BP       | 0.00 (0.905)              | 0.00 (0.965)                               | 0.00 (0.973)                                           | 0.00 (0.998)                                                 | 0.00 (0.975)                        | 0.01 (0.884)                                 |
| Historical diastolic BP      | 0.07 (0.039)              | 0.07 (0.011)                               | 0.06 (0.023)                                           | 0.05 (0.068)                                                 | 0.04 (0.227)                        | 0.04 (0.200)                                 |
| Poor BP control              | 0.00 (0.943)              | 0.01 (0.728)                               | 0.01 (0.754)                                           | 0.00 (0.931)                                                 | -0.01 (0.771)                       | -0.01 (0.883)                                |
| Hypertension                 | -0.02 (0.634)             | -0.02 (0.580)                              | -0.01 (0.831)                                          | 0.00 (0.900)                                                 | 0.01 (0.805)                        | 0.01 (0.721)                                 |
| Pack-years                   | -0.05 (0.193)             | -0.05 (0.088)                              | -0.05 (0.121)                                          | -0.03 (0.357)                                                | -0.01 (0.756)                       | -0.01 (0.772)                                |
| Historical HbA <sub>1c</sub> | 0.02 (0.514)              | 0.00 (0.971)                               | 0.01 (0.632)                                           | 0.03 (0.291)                                                 | 0.04 (0.159)                        | 0.05 (0.098)                                 |
| Poor glycaemic control       | 0.03 (0.336)              | -0.01 (0.704)                              | 0.00 (0.910)                                           | 0.01 (0.745)                                                 | 0.04 (0.242)                        | 0.04 (0.177)                                 |
| Clinic plasma glucose        | 0.05 (0.151)              | 0.02 (0.394)                               | 0.03 (0.238)                                           | 0.03 (0.212)                                                 | 0.05 (0.120)                        | 0.06 (0.082)                                 |
| <u>Faces</u>                 |                           |                                            |                                                        |                                                              |                                     |                                              |
| Cholesterol                  | 0.05 (0.145)              | 0.04 (0.136)                               | 0.04 (0.163)                                           | 0.03 (0.264)                                                 | 0.03 (0.407)                        | 0.03 (0.382)                                 |
| Hypercholesterolaemia        | -0.02 (0.653)             | 0.00 (0.890)                               | 0.01 (0.862)                                           | 0.00 (0.888)                                                 | 0.01 (0.731)                        | -0.01 (0.757)                                |
| Historical systolic BP       | -0.03 (0.468)             | -0.03 (0.250)                              | -0.03 (0.229)                                          | -0.04 (0.196)                                                | -0.03 (0.402)                       | -0.03 (0.377)                                |
| Historical diastolic BP      | 0.04 (0.259)              | 0.02 (0.536)                               | 0.01 (0.727)                                           | 0.00 (0.931)                                                 | 0.02 (0.562)                        | 0.00 (0.903)                                 |
| Poor BP control              | -0.02 (0.511)             | -0.02 (0.519)                              | -0.02 (0.445)                                          | -0.03 (0.309)                                                | -0.03 (0.341)                       | -0.04 (0.262)                                |
| Hypertension                 | 0.00 (0.943)              | 0.03 (0.337)                               | 0.03 (0.278)                                           | 0.04 (0.138)                                                 | 0.03 (0.385)                        | 0.04 (0.259)                                 |
| Pack-years                   | -0.14 (<0.001)            | -0.09 (0.003)                              | -0.08 (0.006)                                          | -0.07 (0.013)                                                | -0.12 (0.001)                       | -0.12 (0.001)                                |

|                                 |               |               |               |               |               |               |
|---------------------------------|---------------|---------------|---------------|---------------|---------------|---------------|
| Historical HbA <sub>1c</sub>    | -0.10 (0.003) | -0.06 (0.030) | -0.06 (0.049) | -0.06 (0.056) | -0.09 (0.005) | -0.07 (0.036) |
| Poor glycaemic control          | -0.07 (0.052) | -0.04 (0.138) | -0.04 (0.184) | -0.04 (0.177) | -0.07 (0.039) | -0.05 (0.143) |
| Clinic plasma glucose           | -0.03 (0.375) | -0.01 (0.837) | 0.00 (0.947)  | -0.01 (0.784) | -0.03 (0.298) | -0.03 (0.433) |
| <u>Letter-Number Sequencing</u> |               |               |               |               |               |               |
| Cholesterol                     | 0.04 (0.314)  | 0.01 (0.637)  | 0.01 (0.686)  | 0.00 (0.912)  | 0.00 (0.956)  | 0.00 (0.987)  |
| Hypercholesterolaemia           | 0.02 (0.482)  | 0.02 (0.606)  | 0.02 (0.421)  | 0.03 (0.283)  | 0.04 (0.235)  | 0.04 (0.183)  |
| Historical systolic BP          | 0.01 (0.842)  | -0.02 (0.603) | -0.01 (0.685) | -0.02 (0.611) | 0.00 (0.915)  | 0.00 (0.924)  |
| Historical diastolic BP         | 0.02 (0.607)  | 0.00 (0.947)  | -0.01 (0.844) | -0.02 (0.434) | -0.02 (0.576) | -0.02 (0.470) |
| Poor BP control                 | 0.03 (0.455)  | 0.01 (0.777)  | 0.01 (0.666)  | 0.01 (0.852)  | 0.01 (0.738)  | 0.02 (0.617)  |
| Hypertension                    | 0.02 (0.670)  | 0.02 (0.551)  | 0.03 (0.279)  | 0.05 (0.094)  | 0.04 (0.238)  | 0.05 (0.114)  |
| Pack-years                      | -0.08 (0.040) | -0.07 (0.030) | -0.06 (0.056) | -0.04 (0.188) | -0.04 (0.242) | -0.03 (0.313) |
| Historical HbA <sub>1c</sub>    | -0.07 (0.040) | -0.07 (0.029) | -0.06 (0.068) | -0.05 (0.128) | -0.06 (0.072) | -0.04 (0.227) |
| Poor glycaemic control          | 0.00 (0.920)  | -0.01 (0.709) | 0.00 (0.985)  | 0.01 (0.788)  | 0.00 (0.996)  | 0.02 (0.591)  |
| Clinic plasma glucose           | 0.02 (0.555)  | 0.03 (0.391)  | 0.03 (0.274)  | 0.03 (0.266)  | 0.02 (0.494)  | 0.03 (0.348)  |
| <u>Matrix Reasoning</u>         |               |               |               |               |               |               |
| Cholesterol                     | 0.05 (0.146)  | 0.00 (0.898)) | -0.01 (0.846) | -0.01 (0.850) | 0.02 (0.502)  | 0.02 (0.563)  |
| Hypercholesterolaemia           | 0.01 (0.768)  | -0.01 (0.590) | -0.01 (0.643) | -0.01 (0.776) | 0.02 (0.534)  | 0.02 (0.443)  |
| Historical systolic BP          | -0.04 (0.247) | -0.06 (0.026) | -0.06 (0.018) | -0.06 (0.021) | -0.04 (0.183) | -0.04 (0.175) |
| Historical diastolic BP         | -0.02 (0.591) | -0.05 (0.091) | -0.06 (0.026) | -0.07 (0.009) | -0.05 (0.107) | -0.06 (0.044) |
| Poor BP control                 | 0.03 (0.408)  | -0.03 (0.284) | -0.03 (0.278) | -0.03 (0.192) | -0.04 (0.224) | -0.04 (0.233) |
| Hypertension                    | -0.01 (0.760) | -0.04 (0.118) | -0.04 (0.182) | -0.02 (0.410) | 0.01 (0.744)  | 0.02 (0.500)  |
| Pack-years                      | -0.12 (0.001) | -0.06 (0.031) | -0.05 (0.055) | -0.04 (0.106) | -0.08 (0.021) | -0.07 (0.030) |
| Historical HbA <sub>1c</sub>    | -0.06 (0.077) | -0.05 (0.052) | -0.04 (0.208) | -0.03 (0.272) | -0.05 (0.113) | -0.03 (0.399) |
| Poor glycaemic control          | -0.03 (0.372) | -0.04 (0.095) | -0.03 (0.255) | -0.03 (0.293) | -0.03 (0.278) | -0.01 (0.679) |
| Clinic plasma glucose           | 0.05 (0.143)  | 0.02 (0.379)  | 0.03 (0.266)  | 0.03 (0.250)  | 0.04 (0.158)  | 0.05 (0.098)  |
| <u>Trail-Making Test</u>        |               |               |               |               |               |               |
| Cholesterol                     | -0.05 (0.176) | -0.02 (0.483) | -0.01 (0.625) | -0.01 (0.813) | -0.02 (0.544) | -0.02 (0.564) |
| Hypercholesterolaemia           | -0.02 (0.587) | 0.00 (0.910)  | 0.00 (0.879)  | -0.01 (0.780) | -0.03 (0.340) | -0.03 (0.380) |
| Historical systolic BP          | -0.01 (0.684) | 0.01 (0.638)  | 0.00 (0.881)  | 0.01 (0.811)  | -0.01 (0.740) | -0.03 (0.425) |
| Historical diastolic BP         | -0.06 (0.099) | -0.02 (0.374) | -0.02 (0.453) | -0.01 (0.693) | -0.03 (0.398) | -0.02 (0.457) |
| Poor BP control                 | -0.03 (0.470) | -0.01 (0.839) | -0.01 (0.588) | -0.01 (0.799) | -0.01 (0.665) | -0.03 (0.391) |
| Hypertension                    | -0.06 (0.058) | -0.03 (0.280) | -0.03 (0.200) | -0.05 (0.082) | -0.09 (0.007) | -0.09 (0.003) |
| Pack-years                      | 0.12 (0.001)  | 0.07 (0.013)  | 0.07 (0.019)  | 0.05 (0.063)  | 0.09 (0.012)  | 0.08 (0.013)  |
| Historical HbA <sub>1c</sub>    | 0.11 (0.002)  | 0.06 (0.026)  | 0.05 (0.047)  | 0.06 (0.032)  | 0.11 (0.001)  | 0.09 (0.008)  |
| Poor glycaemic control          | 0.02 (0.523)  | 0.00 (0.973)  | 0.00 (0.867)  | -0.01 (0.794) | 0.02 (0.510)  | 0.01 (0.885)  |
| Clinic plasma glucose           | -0.05 (0.163) | -0.02 (0.385) | -0.03 (0.238) | -0.03 (0.316) | -0.04 (0.194) | -0.06 (0.080) |
| <u>Verbal Fluency</u>           |               |               |               |               |               |               |

|                              |                |                |               |               |                |                |
|------------------------------|----------------|----------------|---------------|---------------|----------------|----------------|
| Cholesterol                  | 0.10 (0.007)   | 0.00 (0.966)   | 0.00 (0.879)  | -0.01 (0.821) | 0.06 (0.063)   | 0.06 (0.057)   |
| Hypercholesterolaemia        | 0.00 (0.959)   | -0.01 (0.672)  | -0.01 (0.712) | -0.01 (0.666) | 0.02 (0.573)   | 0.01 (0.681)   |
| Historical systolic BP       | 0.01 (0.784)   | -0.02 (0.363)  | -0.02 (0.423) | -0.01 (0.599) | 0.01 (0.779)   | 0.02 (0.580)   |
| Historical diastolic BP      | 0.04 (0.315)   | 0.00 (0.936)   | 0.00 (0.902)  | -0.01 (0.806) | 0.01 (0.868)   | 0.00 (0.984)   |
| Poor BP control              | 0.01 (0.870)   | 0.00 (0.898)   | 0.00 (0.901)  | 0.00 (0.967)  | 0.00 (0.987)   | 0.00 (0.930)   |
| Hypertension                 | -0.04 (0.318)  | -0.03 (0.109)  | -0.03 (0.149) | -0.03 (0.225) | -0.01 (0.728)  | -0.01 (0.859)  |
| Pack-years                   | -0.05 (0.183)  | -0.05 (0.024)  | -0.05 (0.025) | -0.04 (0.066) | -0.01 (0.716)  | -0.02 (0.657)  |
| Historical HbA <sub>1c</sub> | -0.13 (<0.001) | -0.07 (<0.001) | -0.07 (0.001) | -0.07 (0.001) | -0.12 (<0.001) | -0.10 (0.003)  |
| Poor glycaemic control       | -0.06 (0.078)  | -0.05 (0.015)  | -0.05 (0.020) | -0.05 (0.017) | -0.06 (0.052)  | -0.04 (0.228)  |
| Clinic plasma glucose        | 0.00 (0.906)   | -0.01 (0.756)  | 0.00 (0.978)  | 0.00 (0.892)  | 0.00 (0.923)   | 0.01 (0.778)   |
| <b>Digit Symbol Coding</b>   |                |                |               |               |                |                |
| Cholesterol                  | 0.05 (0.154)   | 0.01 (0.773)   | 0.00 (0.987)  | 0.00 (0.860)  | 0.02 (0.538)   | 0.01 (0.713)   |
| Hypercholesterolaemia        | 0.04 (0.212)   | 0.03 (0.281)   | 0.03 (0.226)  | 0.03 (0.234)  | 0.05 (0.091)   | 0.06 (0.063)   |
| Historical systolic BP       | 0.02 (0.667)   | 0.00 (0.881)   | 0.01 (0.621)  | 0.01 (0.619)  | 0.01 (0.749)   | 0.02 (0.452)   |
| Historical diastolic BP      | 0.04 (0.298)   | -0.01 (0.686)  | -0.01 (0.580) | -0.02 (0.409) | 0.01 (0.884)   | -0.01 (0.806)  |
| Poor BP control              | 0.01 (0.733)   | 0.01 (0.646)   | 0.02 (0.475)  | 0.01 (0.548)  | 0.00 (0.924)   | 0.01 (0.722)   |
| Hypertension                 | 0.01 (0.720)   | 0.03 (0.262)   | 0.03 (0.173)  | 0.04 (0.100)  | 0.03 (0.324)   | 0.05 (0.132)   |
| Pack-years                   | -0.17 (<0.001) | -0.09 (0.001)  | -0.09 (0.001) | -0.08 (0.001) | -0.14 (<0.001) | -0.14 (<0.001) |
| Historical HbA <sub>1c</sub> | -0.10 (0.004)  | -0.04 (0.097)  | -0.04 (0.118) | -0.04 (0.106) | -0.09 (0.007)  | -0.06 (0.052)  |
| Poor glycaemic control       | -0.03 (0.462)  | 0.01 (0.719)   | 0.01 (0.824)  | 0.00 (0.867)  | -0.03 (0.419)  | -0.01 (0.730)  |
| Clinic plasma glucose        | 0.02 (0.639)   | 0.02 (0.524)   | 0.02 (0.339)  | 0.02 (0.445)  | 0.01 (0.691)   | 0.03 (0.332)   |

Data are shown as standardised  $\beta$  coefficients ( $p$  values).  $N=771$  to  $825$ . Results are from multiple linear regression models performed separately for each risk factor. Outcome variable is  $g$  at year 4. Adjustment of year 4 scores for baseline scores represented four-year change in cognitive performance. Cognitive test scores obtained at year 4 were adjusted for baseline MHVS to estimate the lifetime change in cognitive function. Pack-years are square root transformed. Clinic plasma glucose was transformed to its natural logarithm. MHVS, Mill Hill Vocabulary Scale. Hypertension was defined as systolic blood pressure  $\geq 140$ mmHg and/or diastolic blood pressure  $\geq 85$ mmHg and/or self-reported medication prescribed by a doctor to lower blood pressure. Hypercholesterolaemia was defined as plasma total cholesterol  $\geq 5$  mmol/L and/or self-reported medication prescribed by a doctor to lower blood lipids level. Poor glycaemic control was defined as historical HbA<sub>1c</sub>  $>7\%$  ( $>53$  mmol/mol). Poor blood pressure control was defined as historical systolic blood pressure  $\geq 140$ mmHg and/or historical diastolic blood pressure  $\geq 85$ mmHg. Covariates are baseline myocardial infarction, transient ischaemic attack, stroke, angina, duration of diabetes.
