# Supplementary material for: Cardiovascular risk factors and cognitive decline in older people with type 2 diabetes
Source: Springer Nature journal article supplement (doi:10.1007/s00125-015-3581-0), 2015-04-06
Supplement: MOESM2 [file 8092962]

**ESM Table 2: Results from multiple adjusted linear regression models of follow-up *g* and change in *g* on each of the vascular risk factors, for male and female subsamples**

|                              | Age and sex adjusted beta | Four-year cognitive change                    |                                                            |                                                                  |
|------------------------------|---------------------------|-----------------------------------------------|------------------------------------------------------------|------------------------------------------------------------------|
|                              |                           | Beta adjusted for age, sex, baseline <i>g</i> | Beta adjusted for age, sex, baseline <i>g</i> , covariates | Beta adjusted for age, sex, baseline <i>g</i> , covariates, MHVS |
| <b>Men</b>                   |                           |                                               |                                                            |                                                                  |
| Cholesterol                  | 0.08 (0.107)              | -0.01 (0.860)                                 | -0.01 (0.882)                                              | -0.02 (0.767)                                                    |
| Hypercholesterolaemia        | 0.02 (0.695)              | 0.02 (0.650)                                  | 0.03 (0.598)                                               | 0.01 (0.817)                                                     |
| Historical systolic BP       | -0.01 (0.916)             | -0.13 (0.007)                                 | -0.12 (0.013)                                              | -0.15 (0.002)                                                    |
| Historical diastolic BP      | 0.07 (0.132)              | -0.01 (0.803)                                 | -0.02 (0.714)                                              | -0.04 (0.436)                                                    |
| Poor BP control              | 0.02 (0.723)              | -0.07 (0.166)                                 | -0.05 (0.274)                                              | -0.08 (0.085)                                                    |
| Hypertension                 | 0.01 (0.795)              | -0.03 (0.602)                                 | -0.02 (0.690)                                              | -0.01 (0.808)                                                    |
| Pack-years                   | -0.13 (0.008)             | -0.14 (0.004)                                 | -0.14 (0.005)                                              | -0.11 (0.030)                                                    |
| Historical HbA <sub>1c</sub> | -0.15 (0.001)             | -0.04 (0.392)                                 | -0.03 (0.451)                                              | -0.03 (0.608)                                                    |
| Poor glycaemic control       | -0.04 (0.395)             | -0.02 (0.720)                                 | -0.01 (0.909)                                              | 0.01 (0.861)                                                     |
| Clinic plasma glucose        | 0.03 (0.494)              | 0.09 (0.057)                                  | 0.10 (0.047)                                               | 0.10 (0.046)                                                     |
| <b>Women</b>                 |                           |                                               |                                                            |                                                                  |
| Cholesterol                  | 0.09 (0.072)              | 0.03 (0.603)                                  | 0.01 (0.927)                                               | 0.00 (0.990)                                                     |
| Hypercholesterolaemia        | 0.02 (0.625)              | 0.01 (0.845)                                  | 0.01 (0.773)                                               | 0.02 (0.694)                                                     |
| Historical systolic BP       | 0.00 (0.962)              | 0.00 (0.987)                                  | 0.00 (0.956)                                               | 0.01 (0.825)                                                     |
| Historical diastolic BP      | 0.02 (0.688)              | 0.00 (0.972)                                  | -0.01 (0.864)                                              | -0.01 (0.800)                                                    |
| Poor BP control              | 0.00 (0.946)              | 0.05 (0.279)                                  | 0.06 (0.277)                                               | 0.06 (0.231)                                                     |
| Hypertension                 | 0.01 (0.886)              | 0.03 (0.603)                                  | 0.04 (0.451)                                               | 0.06 (0.231)                                                     |
| Pack-years                   | -0.16 (0.001)             | -0.14 (0.006)                                 | -0.12 (0.017)                                              | -0.12 (0.025)                                                    |
| Historical HbA <sub>1c</sub> | -0.08 (0.131)             | -0.19 (<0.001)                                | -0.17 (0.002)                                              | -0.17 (0.002)                                                    |
| Poor glycaemic control       | -0.02 (0.658)             | -0.09 (0.084)                                 | -0.07 (0.174)                                              | -0.08 (0.118)                                                    |
| Clinic plasma glucose        | 0.04 (0.410)              | -0.03 (0.542)                                 | -0.01 (0.784)                                              | -0.02 (0.650)                                                    |

Data are shown as standardised  $\beta$  coefficients (*p* values). *N*=389 to 424 for men; *N*= 387 to 399 for women. Results are from multiple linear regression models performed separately for each risk factor. Outcome variable is *g* at year 4. Pack-years are square root transformed. Clinic plasma glucose was transformed to its natural logarithm. MHVS, Mill-Hill Vocabulary Scale. Hypertension was defined as systolic blood pressure  $\geq 140$ mmHg and/or diastolic blood pressure  $\geq 85$ mmHg and/or self-reported medication prescribed by a doctor to lower blood pressure. Hypercholesterolaemia was defined as plasma total cholesterol  $\geq 5$  mmol/L and/or self-reported medication prescribed by a doctor to lower blood lipids level. Poor glycaemic control was defined as historical HbA<sub>1c</sub> >7% (>53 mmol/mol). Poor blood pressure control was defined as historical systolic blood pressure  $\geq 140$ mmHg and/or historical diastolic blood pressure  $\geq 85$ mmHg. Covariates are baseline myocardial infarction, transient ischaemic attack, stroke, angina, duration of diabetes.
